# Supplementary material
Source: PubMed Central journal article supplement (PMC10540087)
Supplement: NIHMS1931483-supplement-SI.pdf [file NIHMS1931483-supplement-SI.pdf]

## Supplementary Information

### Supplementary Text

**Determination of reagent cross-reactivity.** When adding a new, candidate protein to an existing multiplexed digital ELISA, two experiments were performed to ensure that the new protein and detection reagents did not cross-react with the existing reagents and result in elevated false positive AEB signals for any of the proteins. In experiment #1 (see table below for design), a calibration curve (0 to 100 pg/mL) was generated for the new protein based on its specific capture and detection reagents, with and without: a) the addition of 100 pg/mL of the existing multiplexed proteins to each sample; and b) a mixture of all the biotinylated detection antibodies for the multiplexed proteins used at the detection antibody labeling step. In experiment #2 (see table below for design), 0 and 10 pg/mL of each of the existing multiplexed proteins were spiked into a sample, and detected using the multiplexed digital ELISA, with and without: a) 100 pg/mL of the candidate protein in the sample; and b) the biotinylated detection antibody against the candidate protein at the detection antibody labeling step. If unanticipated increases in false positive signals were observed in either of these experiments then the new protein was not selected to be part of the multiplex. Examples of the data generated in Experiments #1 and #2 are shown in **Supplementary Figure 2**.

Experiment #1:

|                        | Run 1   |         |          | compared to | Run 2   |         |          |
|------------------------|---------|---------|----------|-------------|---------|---------|----------|
|                        | Capture | Analyte | Detector |             | Capture | Analyte | Detector |
| New protein            | X       | X       | X        |             | X       | X       | X        |
| Existing protein #1    |         |         |          |             | X       |         | X        |
| Existing protein #2    |         |         |          |             |         | X       | X        |
| ...Existing protein #N |         |         |          |             |         | X       | X        |

Experiment #2:

|                        | Run 1   |         |          | compared to | Run 2   |         |          |
|------------------------|---------|---------|----------|-------------|---------|---------|----------|
|                        | Capture | Analyte | Detector |             | Capture | Analyte | Detector |
| New protein            |         |         |          |             |         | X       | X        |
| Existing protein #1    | X       | X       | X        |             | X       | X       | X        |
| Existing protein #2    | X       | X       | X        |             | X       | X       | X        |
| ...Existing protein #N | X       | X       | X        |             | X       | X       | X        |

## Supplementary Figures

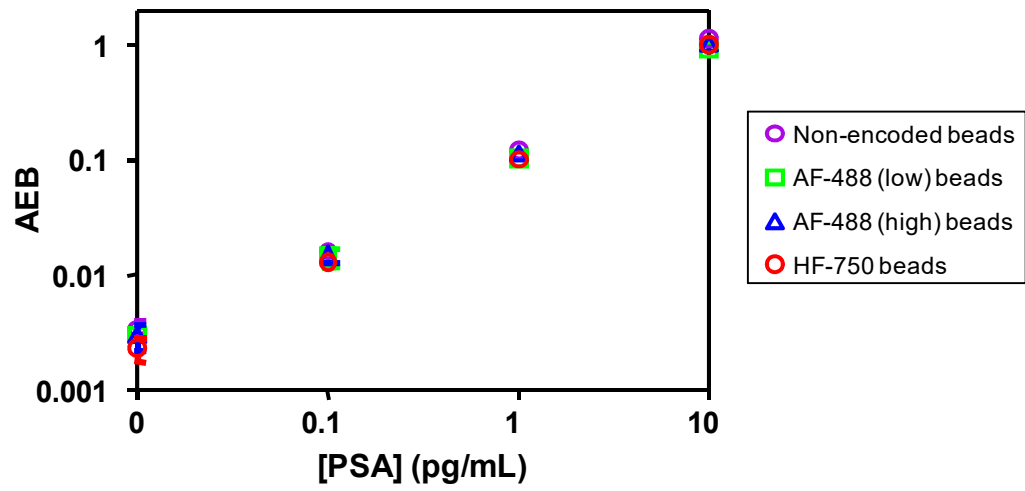

**Supplementary Figure 1.** Plots of AEB against concentration of PSA for digital ELISAs developed with non-encoded beads and beads labeled with fluorescent dyes to enable decoding.

A

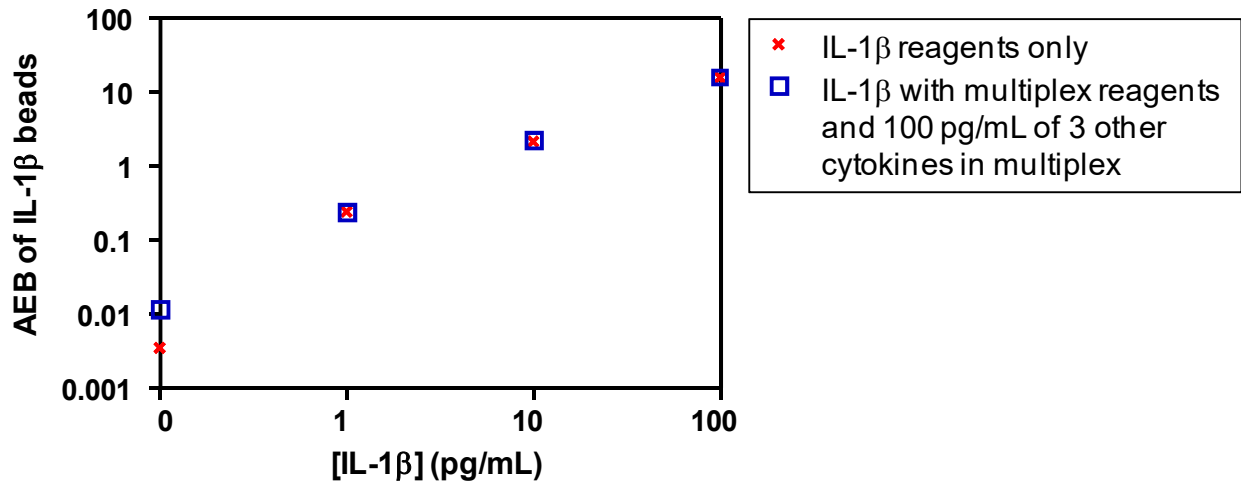

| [IL-1β] (pg/mL) | AEB from IL-1b beads<br>IL-1b reagents only | AEB from IL-1b beads<br>IL-1b reagents plus 100 pg/mL<br>of 3 cytokines and their<br>detection antibodies |
|-----------------|---------------------------------------------|-----------------------------------------------------------------------------------------------------------|
| 0               | 0.0036± 0.0004                              | 0.0118± 0.0007                                                                                            |
| 1               | 0.2525± 0.0047                              | 0.2355± 0.0319                                                                                            |
| 10              | 2.159± 0.3658                               | 2.229± 0.3973                                                                                             |
| 100             | 15.86± 1.295                                | 16.30± 2.243                                                                                              |

B

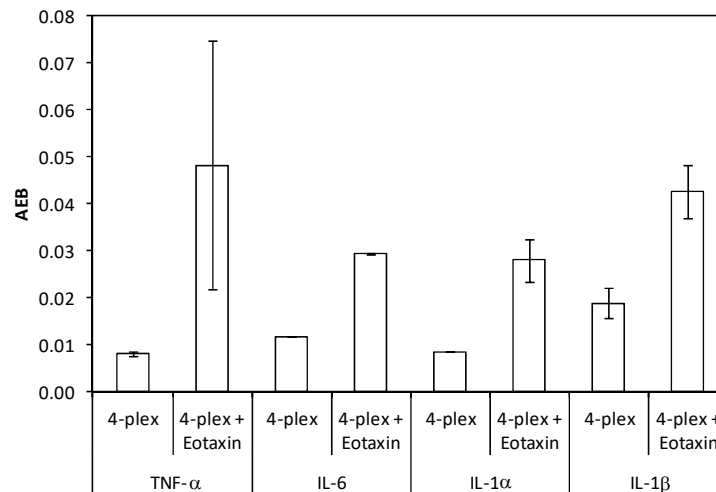

**Supplementary Figure 2.** Examples of experiments to determine cross-reactivity in multiplexed digital ELISA. A) Example of Experiment #1 described above. IL-1β was being added to an existing 3-plex of TNF-α, IL-6, and GM-CSF. IL-1β beads were run in conventional singleplex mode (red crosses), and also with 100 pg/mL each of TNF-α, IL-6, and GM-CSF, and a mixture of the biotinylated detection antibodies for these 3 cytokines added to the assay (blue squares). The 3-fold increase in background signals for IL-1β beads was expected from the use of four-fold higher concentration of detection

antibodies,<sup>1</sup> but no further increase was observed from the presence of 100 pg/mL of 3 other antigens, so cross-reactivity was acceptable. B) Example of Experiment #2 described above. Eotaxin was being added to an existing 4-plex of TNF- $\alpha$ , IL-6, IL-1 $\alpha$ , and IL-1 $\beta$ . The 4-plex was run with all 4 cytokines at 0 pg/mL, with and without 10 pg/mL eotaxin and 0.1  $\mu$ g/mL of its biotinylated detection antibody to assess the effect on backgrounds. For each of the proteins, the backgrounds increased between 2.3–6.1-fold upon addition of eotaxin, an increase not anticipated by the 20% increase in detection antibody concentration. We inferred significant cross-reactivity with eotaxin reagents giving rise to false positive signals, so eotaxin was not added to this multiplex assay.

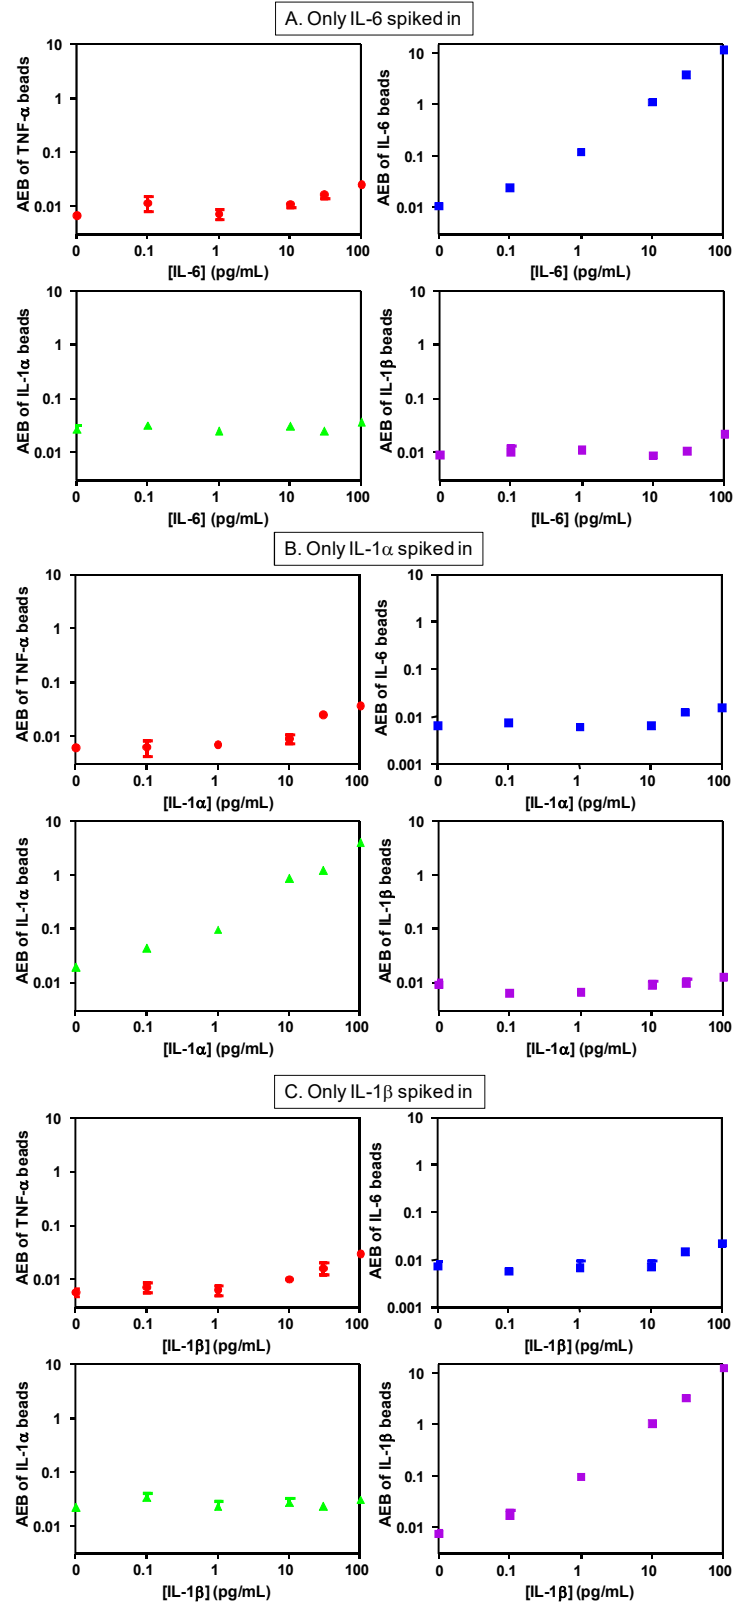

**Supplementary Figure 3.** Plots of AEB against protein concentration for 4 beads specific to 4 cytokines measured in bovine serum samples spiked with: A) only IL-6; B) only IL-1 $\alpha$ ; and C) only IL-1 $\beta$ .

## Supplementary Tables

**Supplementary Table 1.** Effect of fluorescence of unmodified and encoded beads on the channel used to detect fluorescence (resorufin) from the reaction of single enzymes.

| Bead type                     | Average fluorescence in resorufin detection channel (574 nm/615 nm ex/em) |
|-------------------------------|---------------------------------------------------------------------------|
| Unmodified, non-encoded beads | 408±14                                                                    |
| AF-488 fluorescent beads      | 390±9                                                                     |
| cy5 fluorescent beads (low)   | 401±12                                                                    |
| cy5 fluorescent beads (high)  | 408±11                                                                    |
| HF-750 fluorescent beads      | 420±12                                                                    |

**Supplementary Table 2.** AEB values of 4 bead types in a 4-plex measured in samples spiked with IL-6 before and after software correction of crosstalk. Significant crosstalk was observed at 100 pg/mL IL-6 in all three non-IL-6 bead types, and these false positive signals are greatly reduced by correction without affecting the IL-6 bead data.

| Beads measured      | [IL-6] pg/mL | Before crosstalk correction |       |       | After crosstalk correction |       |       |
|---------------------|--------------|-----------------------------|-------|-------|----------------------------|-------|-------|
|                     |              | AEB                         | s.d.  | CV    | AEB                        | s.d.  | CV    |
| IL-6 beads          | 0            | <b>0.012</b>                | 0.001 | 8.0%  | <b>0.012</b>               | 0.001 | 8.3%  |
|                     | 1            | <b>0.103</b>                | 0.007 | 6.4%  | <b>0.103</b>               | 0.007 | 6.7%  |
|                     | 10           | <b>0.921</b>                | 0.021 | 2.2%  | <b>0.922</b>               | 0.021 | 2.2%  |
|                     | 100          | <b>6.187</b>                | 0.098 | 1.6%  | <b>6.188</b>               | 0.093 | 1.5%  |
| TNF- $\alpha$ beads | 0            | <b>0.019</b>                | 0.001 | 7.5%  | <b>0.019</b>               | 0.001 | 7.5%  |
|                     | 1            | <b>0.020</b>                | 0.001 | 5.1%  | <b>0.021</b>               | 0.001 | 5.5%  |
|                     | 10           | <b>0.021</b>                | 0.000 | 0.9%  | <b>0.021</b>               | 0.000 | 1.5%  |
|                     | 100          | <b>0.060</b>                | 0.001 | 1.9%  | <b>0.031</b>               | 0.003 | 10.0% |
| IL-1 $\beta$ beads  | 0            | <b>0.021</b>                | 0.001 | 6.0%  | <b>0.021</b>               | 0.001 | 6.4%  |
|                     | 1            | <b>0.023</b>                | 0.001 | 5.2%  | <b>0.023</b>               | 0.001 | 6.1%  |
|                     | 10           | <b>0.023</b>                | 0.004 | 15.7% | <b>0.023</b>               | 0.004 | 15.6% |
|                     | 100          | <b>0.060</b>                | 0.002 | 3.9%  | <b>0.031</b>               | 0.000 | 0.1%  |
| IL-1 $\alpha$ beads | 0            | <b>0.018</b>                | 0.003 | 16.1% | <b>0.018</b>               | 0.003 | 17.1% |
|                     | 1            | <b>0.023</b>                | 0.003 | 12.2% | <b>0.023</b>               | 0.003 | 13.0% |
|                     | 10           | <b>0.023</b>                | 0.001 | 3.1%  | <b>0.023</b>               | 0.001 | 3.7%  |
|                     | 100          | <b>0.069</b>                | 0.001 | 0.9%  | <b>0.033</b>               | 0.001 | 1.5%  |

**Supplementary Table 3.** AEB as a function of concentration for calibration curves shown in **Figure 5** and **Supplementary Fig. 3**.

| Experiment                                            | TNF- $\alpha$ beads |         |        |           | IL-6 beads          |        |        |           | IL-1 $\alpha$ beads |        |        |           | IL-1 $\beta$ beads  |         |        |           |
|-------------------------------------------------------|---------------------|---------|--------|-----------|---------------------|--------|--------|-----------|---------------------|--------|--------|-----------|---------------------|---------|--------|-----------|
|                                                       | [cytokine]<br>pg/mL | AEB     | s.d.   | CV<br>(%) | [cytokine]<br>pg/mL | AEB    | s.d.   | CV<br>(%) | [cytokine]<br>pg/mL | AEB    | s.d.   | CV<br>(%) | [cytokine]<br>pg/mL | AEB     | s.d.   | CV<br>(%) |
| <b>TNF-<math>\alpha</math><br/>only spiked<br/>in</b> | 0                   | 0.0091  | 0.0011 | 12%       | 0                   | 0.0086 | 0.0016 | 19%       | 0                   | 0.0306 | 0.0029 | 10%       | 0                   | 0.0083  | 0.0038 | 45%       |
|                                                       | 0.1                 | 0.0246  | 0.0059 | 24%       | 0.1                 | 0.0127 | 0.0041 | 32%       | 0.1                 | 0.0377 | 0.0057 | 15%       | 0.1                 | 0.0106  | 0.0009 | 9%        |
|                                                       | 1                   | 0.0972  | 0.0079 | 8%        | 1                   | 0.0086 | 0.0005 | 6%        | 1                   | 0.0283 | 0.0028 | 10%       | 1                   | 0.0081  | 0.0016 | 19%       |
|                                                       | 10                  | 0.9197  | 0.0328 | 4%        | 10                  | 0.0074 | 0.0013 | 18%       | 10                  | 0.0411 | 0.0034 | 8%        | 10                  | 0.0107  | 0.0015 | 14%       |
|                                                       | 30                  | 3.0050  | 0.0799 | 3%        | 30                  | 0.0127 | 0.0032 | 25%       | 30                  | 0.0233 | 0.0035 | 15%       | 30                  | 0.0102  | 0.0022 | 22%       |
|                                                       | 100                 | 10.3392 | 0.4893 | 5%        | 100                 | 0.0151 | 0.0013 | 9%        | 100                 | 0.0259 | 0.0014 | 5%        | 100                 | 0.0142  | 0.0023 | 16%       |
| <b>IL-6 only<br/>spiked in</b>                        | 0                   | 0.0068  | 0.0008 | 12%       | 0                   | 0.0108 | 0.0001 | 1%        | 0                   | 0.0271 | 0.0058 | 22%       | 0                   | 0.0090  | 0.0008 | 9%        |
|                                                       | 0.1                 | 0.0115  | 0.0034 | 30%       | 0.1                 | 0.0245 | 0.0012 | 5%        | 0.1                 | 0.0321 | 0.0018 | 6%        | 0.1                 | 0.0102  | 0.0034 | 34%       |
|                                                       | 1                   | 0.0072  | 0.0016 | 23%       | 1                   | 0.1218 | 0.0071 | 6%        | 1                   | 0.0251 | 0.0018 | 7%        | 1                   | 0.0114  | 0.0010 | 8%        |
|                                                       | 10                  | 0.0110  | 0.0017 | 15%       | 10                  | 1.1289 | 0.0415 | 4%        | 10                  | 0.0309 | 0.0036 | 12%       | 10                  | 0.0089  | 0.0007 | 8%        |
|                                                       | 30                  | 0.0166  | 0.0026 | 16%       | 30                  | 3.8783 | 0.3436 | 9%        | 30                  | 0.0253 | 0.0034 | 13%       | 30                  | 0.0109  | 0.0018 | 16%       |
|                                                       | 100                 | 0.0254  | 0.0031 | 12%       | 100                 | 11.895 | 0.4263 | 4%        | 100                 | 0.0366 | 0.0044 | 12%       | 100                 | 0.0224  | 0.0019 | 8%        |
| <b>IL-1<math>\alpha</math> only<br/>spiked in</b>     | 0                   | 0.0062  | 0.0001 | 1%        | 0                   | 0.0067 | 0.0013 | 19%       | 0                   | 0.0195 | 0.0004 | 2%        | 0                   | 0.0093  | 0.0021 | 23%       |
|                                                       | 0.1                 | 0.0063  | 0.0021 | 34%       | 0.1                 | 0.0077 | 0.0004 | 6%        | 0.1                 | 0.0445 | 0.0045 | 10%       | 0.1                 | 0.0064  | 0.0009 | 14%       |
|                                                       | 1                   | 0.0071  | 0.0009 | 13%       | 1                   | 0.0062 | 0.0011 | 18%       | 1                   | 0.0975 | 0.0052 | 5%        | 1                   | 0.0067  | 0.0005 | 8%        |
|                                                       | 10                  | 0.0091  | 0.0016 | 17%       | 10                  | 0.0067 | 0.0011 | 17%       | 10                  | 0.8641 | 0.0119 | 1%        | 10                  | 0.0091  | 0.0018 | 19%       |
|                                                       | 30                  | 0.0255  | 0.0026 | 10%       | 30                  | 0.0126 | 0.0017 | 14%       | 30                  | 1.2379 | 0.0220 | 2%        | 30                  | 0.0098  | 0.0018 | 18%       |
|                                                       | 100                 | 0.0371  | 0.0003 | 1%        | 100                 | 0.0158 | 0.0008 | 5%        | 100                 | 3.9964 | 0.2728 | 7%        | 100                 | 0.0130  | 0.0021 | 16%       |
| <b>IL-1<math>\beta</math> only<br/>spiked in</b>      | 0                   | 0.0058  | 0.0010 | 16%       | 0                   | 0.0075 | 0.0018 | 24%       | 0                   | 0.0221 | 0.0021 | 9%        | 0                   | 0.0075  | 0.0014 | 19%       |
|                                                       | 0.1                 | 0.0072  | 0.0015 | 21%       | 0.1                 | 0.0058 | 0.0006 | 11%       | 0.1                 | 0.0337 | 0.0068 | 20%       | 0.1                 | 0.0173  | 0.0043 | 25%       |
|                                                       | 1                   | 0.0064  | 0.0014 | 22%       | 1                   | 0.0070 | 0.0026 | 37%       | 1                   | 0.0233 | 0.0060 | 26%       | 1                   | 0.0969  | 0.0128 | 13%       |
|                                                       | 10                  | 0.0101  | 0.0005 | 5%        | 10                  | 0.0074 | 0.0021 | 29%       | 10                  | 0.0269 | 0.0056 | 21%       | 10                  | 1.0688  | 0.0463 | 4%        |
|                                                       | 30                  | 0.0163  | 0.0040 | 25%       | 30                  | 0.0152 | 0.0021 | 14%       | 30                  | 0.0235 | 0.0034 | 14%       | 30                  | 3.3097  | 0.3495 | 11%       |
|                                                       | 100                 | 0.0302  | 0.0033 | 11%       | 100                 | 0.0228 | 0.0040 | 17%       | 100                 | 0.0307 | 0.0030 | 10%       | 100                 | 12.6250 | 1.5968 | 13%       |
| <b>All 4<br/>cytokines<br/>spiked in</b>              | 0                   | 0.0100  | 0.0027 | 27%       | 0                   | 0.0078 | 0.0013 | 16%       | 0                   | 0.0268 | 0.0022 | 8%        | 0                   | 0.0074  | 0.0014 | 19%       |
|                                                       | 0.1                 | 0.0218  | 0.0022 | 10%       | 0.1                 | 0.0240 | 0.0026 | 11%       | 0.1                 | 0.0515 | 0.0056 | 11%       | 0.1                 | 0.0207  | 0.0031 | 15%       |
|                                                       | 1                   | 0.0949  | 0.0074 | 8%        | 1                   | 0.1248 | 0.0029 | 2%        | 1                   | 0.1085 | 0.0126 | 12%       | 1                   | 0.1045  | 0.0127 | 12%       |
|                                                       | 10                  | 1.0169  | 0.0112 | 1%        | 10                  | 1.3811 | 0.0416 | 3%        | 10                  | 0.8517 | 0.0502 | 6%        | 10                  | 1.0982  | 0.0146 | 1%        |
|                                                       | 30                  | 3.9060  | 0.3309 | 8%        | 30                  | 3.1087 | 0.2959 | 10%       | 30                  | 1.2566 | 0.0363 | 3%        | 30                  | 3.4399  | 0.2560 | 7%        |
|                                                       | 100                 | 12.3860 | 0.5393 | 4%        | 100                 | 9.0958 | 0.4408 | 5%        | 100                 | 5.2287 | 0.3311 | 6%        | 100                 | 12.4415 | 0.3068 | 2%        |



---

<sup>1</sup> Rissin, D. M.; Kan, C. W.; Campbell, T. G.; Howes, S. C.; Fournier, D. R.; Song, L.; Piech, T.; Patel, P. P.; Chang, L.; Rivnak, A. J.; Ferrell, E. P.; Randall, J. D.; Provuncher, G. K.; Walt, D. R.; Duffy, D. C. *Nat. Biotechnol.* **2010**, *28*, 595-599.
